# Supplementary material for: DNA Methylation Changes Are Associated With an Incremental Ascent to High Altitude
Source: Front Genet. 2019 Oct 29;10:1062. doi: 10.3389/fgene.2019.01062 (PMC6828981; doi:10.3389/fgene.2019.01062)
Supplement: Supplementary file 1 [file DataSheet_1.xlsx]

## Sheet: Sup Table 1
					Supplementary Table 1. Significant associations between phenotypes and altitude
							Beta	p-value
					Hemoglobin
						Namche	15.31	0.007**
						Pheriche	18.41	0.001**
						Gorak Shep	18.63	0.001**
					BMI
						Namche	-0.11	0.136
						Pheriche	-0.24	0.021**
						Gorak Shep	-0.44	<0.001***
					Systolic Blood Pressure
						Namche	5	0.067.
						Pheriche	1	0.711
						Gorak Shep	7.05	0.011*
					Diastolic Blood Pressure
						Namche	4.95	0.001**
						Pheriche	4.19	0.005**
						Gorak Shep	3.38	0.023*
					Mean Arterial Pressure
						Namche	4.97	0.001**
						Pheriche	3.13	0.040*
						Gorak Shep	4.6	0.003**
					Peripheral Oxygen Saturation (SpO2)
						Namche	-4.19	<0.001***
						Pheriche	-7.57	<0.001***
						Gorak Shep	-15.38	<0.001***
					Lake Louise AMS score
						Namche	0.56	0.129
						Pheriche	0.28	0.451
						Gorak Shep	1.99	<0.001***
					All models were adjusted for age, sex, and altitude
					. p-value < 0.10
					* p-value < 0.05
					** p-value < 0.01
					*** p-value < 0.001

## Sheet: Sup Table 2
			Supplementary Table 2: Associations between DNA methylation and phenotypes.
				Primer Sequence	Location
			LINE1 F	TTGAGTTAGGTGTGGGATATAGTT
			LINE1 R	5'-[biotin]-CAAAAAATCAAAAAATTCCCTTTCC	Repetitive element
			LINE1 Seq	AGGTGTGGATATAGT
			EPAS1 F	TGGGAGTAGGGGAAAAATGAT
			EPAS1 R	5'-[biotin]-ACAATCCCCACAATAATTCTTAA	chr2:46526762-46527105
			EPAS1 Seq	AGTAGGGGAAAAATGATT
			PPARa F	GGAGGTTTTTATGAGGATGTAGTT	chr 22: 46547609-46547754
			PPARa R	5'-[biotin]-ACACATATTAACCAACAATAACTATCAT
			PPARa Seq	GGATGTGGTTGTTTG
			RXRA F	GTTTTTAGGTTTAGGTGGTTAGTAAG
			RXRA R	5'-[biotin]-ACCCTAAATAATTCTCTACCTAACTTTTAA	chr9: 137217260 - 137217339
			RXRA Seq	AGGAAGGTTGGGTTT
			EPO F	5'-[biotin]-TTATTTTTGGTAGTAGTGTAGTAGGTTTAG
			EPO R	AAAACCTTAAATAAAACCACCTTATTA	chr7:100321350-100321546
			EPO Seq	CTTAAATAAAACCACCTTATTAAC

## Sheet: Sup Table 3
					Supplementary Table 3. Significant associations between DNA methylation and phenotype
							Beta	p-value
					EPAS1
						Diastolic Blood Pressure	-1.32	0.098.
					EPO
						Systolic Blood Pressure	0.63	0.022 *
						BMI	0.016	0.051.
						Mean Arterial Pressure	0.29	0.078.
					PPARa
						Hemoglobin	-1.37	0.060.
					RXRA
						Hemoglobin	0.54	0.038*
						Systolic Blood Pressure	0.26	0.052.
					All models were adjusted for age, sex, and altitude
					. p-value < 0.10
					* p-value < 0.05
